# Supplementary material
Source: PubMed Central journal article supplement (PMC4717214)
Supplement: ejhg201595x12.pdf [file ejhg201595x12.pdf]

Supplemental table 2. 13 SNPs used for the analysis of FCGR3A locus

| Chr | SNP_Ichip       | dbSNP_ID    | map_hg18  | map_hg19  | Alleles |
|-----|-----------------|-------------|-----------|-----------|---------|
| 1   | 1kg_1_159757967 | rs114414096 | 159757967 | 161491343 | A>G     |
| 1   | 1kg_1_159759291 | rs9427402   | 159759291 | 161492667 | C>G     |
| 1   | 1kg_1_159764975 | rs10919287  | 159764975 | 161498351 | G>C     |
| 1   | 1kg_1_159766754 | rs2099684   | 159766754 | 161500130 | A>G     |
| 1   | 1kg_1_159767599 | rs6700241   | 159767599 | 161500975 | T>C     |
| 1   | 1kg_1_159768069 | rs12120973  | 159768069 | 161501445 | T>A     |
| 1   | 1kg_1_159768251 | rs71632955  | 159768251 | 161501627 | A>C     |
| 1   | 1kg_1_159768511 | rs12133719  | 159768511 | 161501887 | C>G     |
| 1   | 1kg_1_159768603 | rs35852976  | 159768603 | 161501979 | T>C     |
| 1   | 1kg_1_159769473 | rs79568124  | 159769473 | 161502849 | A>G     |
| 1   | 1kg_1_159775387 | rs10919544  | 159775387 | 161508763 | T>C     |
| 1   | 1kg_1_159781950 | rs55971447  | 159781950 | 161515326 | T>C     |
| 1   | 1kg_1_159802755 | rs332398    | 159802755 | 161536131 | T>C     |

Supplemental table 3. 11 SNPs used for the analysis of FCGR3B locus

| Chr | SNP_Ichip       | dbSNP_ID   | map_hg18  | map_hg19  | Alleles |
|-----|-----------------|------------|-----------|-----------|---------|
| 1   | 1kg_1_159838977 | rs67775399 | 159838977 | 161572353 | A>G     |
| 1   | 1kg_1_159841172 | rs2305972  | 159841172 | 161574548 | A>G     |
| 1   | 1kg_1_159858166 | rs61802998 | 159858166 | 161591542 | A>G     |
| 1   | 1kg_1_159863328 | rs2290832  | 159863328 | 161596704 | T>A     |
| 1   | 1kg_1_159863830 | rs72702132 | 159863830 | 161597206 | T>A     |
| 1   | 1kg_1_159864902 | rs34612244 | 159864902 | 161598278 | G>C     |
| 1   | 1kg_1_159867456 | rs3883934  | 159867456 | 161600832 | A>C     |
| 1   | 1kg_1_159867619 | rs34085961 | 159867619 | 161600995 | A>G     |
| 1   | 1kg_1_159867994 | rs35089383 | 159867994 | 161601370 | G>C     |
| 1   | 1kg_1_159874015 | rs1629019  | 159874015 | 161607391 | A>G     |
| 1   | 1kg_1_159884140 | rs17411858 | 159884140 | 161617516 | T>C     |

Supplemental table 4. Segregation of *FCGR3A* and *FCGR3B* CNV in families

| Sample_ID | parent1_child0 | FCGR3A_block | FCGR3B_block | mend error/recombination? |
|-----------|----------------|--------------|--------------|---------------------------|
| gonl-100a | 1              | 2            | 2            |                           |
| gonl-100b | 1              | 2            | 2            |                           |
| gonl-100c | 0              | 2            | 2            |                           |
| gonl-101a | 1              | 2            | 2            |                           |
| gonl-101b | 1              | 2            | 2            |                           |
| gonl-101c | 0              | 2            | 2            |                           |
| gonl-102a | 1              | 2            | 2            |                           |
| gonl-102b | 1              | 3            | 1            |                           |
| gonl-102c | 0              | 3            | 1            |                           |
| gonl-103a | 1              | 2            | 2            |                           |
| gonl-103b | 1              | 2            | 2            |                           |
| gonl-103c | 0              | 2            | 2            |                           |
| gonl-104a | 1              | 2            | 2            |                           |
| gonl-104b | 1              | 2            | 2            |                           |
| gonl-104c | 0              | 2            | 2            |                           |
| gonl-105a | 1              | 2            | 2            |                           |
| gonl-105b | 1              | 2            | 2            |                           |
| gonl-105c | 0              | 2            | 2            |                           |
| gonl-106a | 1              | 2            | 2            |                           |
| gonl-106b | 1              | 3            | 2            |                           |
| gonl-106c | 0              | 3            | 2            |                           |
| gonl-107a | 1              | 2            | 2            |                           |
| gonl-107b | 1              | 2            | 1            |                           |
| gonl-107c | 0              | 2            | 1            |                           |
| gonl-108a | 1              | 2            | 2            |                           |
| gonl-108b | 1              | 2            | 2            |                           |
| gonl-108c | 0              | 2            | 2            |                           |
| gonl-109a | 1              | 2            | 2            |                           |
| gonl-109b | 1              | 3            | 2            |                           |
| gonl-109c | 0              | 3            | 2            |                           |
| gonl-10a  | 1              | 2            | 1            |                           |
| gonl-10b  | 1              | 2            | 2            |                           |
| gonl-10c  | 0              | 2            | 1            |                           |
| gonl-110a | 1              | 2            | 2            |                           |
| gonl-110b | 1              | 2            | 2            |                           |
| gonl-110c | 0              | 2            | 2            |                           |
| gonl-111a | 1              | 2            | 2            |                           |
| gonl-111b | 1              | 2            | 2            |                           |
| gonl-111c | 0              | 2            | 2            |                           |
| gonl-112a | 1              | 2            | 2            |                           |
| gonl-112b | 1              | 2            | 2            |                           |
| gonl-112c | 0              | 2            | 2            |                           |
| gonl-113a | 1              | 2            | 2            |                           |

|           |   |   |   |
|-----------|---|---|---|
| gonl-113b | 1 | 2 | 2 |
| gonl-113c | 0 | 2 | 2 |
| gonl-114a | 1 | 2 | 2 |
| gonl-114b | 1 | 2 | 3 |
| gonl-114c | 0 | 2 | 3 |
| gonl-115a | 1 | 2 | 3 |
| gonl-115b | 1 | 2 | 2 |
| gonl-115c | 0 | 2 | 3 |
| gonl-116a | 1 | 2 | 1 |
| gonl-116b | 1 | 2 | 2 |
| gonl-116c | 0 | 2 | 1 |
| gonl-117a | 1 | 2 | 2 |
| gonl-117b | 1 | 2 | 2 |
| gonl-117c | 0 | 2 | 2 |
| gonl-118a | 1 | 2 | 2 |
| gonl-118b | 1 | 2 | 2 |
| gonl-118c | 0 | 2 | 2 |
| gonl-119a | 1 | 2 | 2 |
| gonl-119b | 1 | 2 | 2 |
| gonl-119c | 0 | 2 | 2 |
| gonl-11a  | 1 | 2 | 2 |
| gonl-11c  | 0 | 2 | 2 |
| gonl-120a | 1 | 2 | 3 |
| gonl-120b | 1 | 2 | 1 |
| gonl-120c | 0 | 2 | 2 |
| gonl-121a | 1 | 2 | 2 |
| gonl-121b | 1 | 2 | 2 |
| gonl-121c | 0 | 2 | 2 |
| gonl-122a | 1 | 2 | 2 |
| gonl-122b | 1 | 2 | 0 |
| gonl-122c | 0 | 2 | 1 |
| gonl-123a | 1 | 2 | 2 |
| gonl-123b | 1 | 2 | 2 |
| gonl-123c | 0 | 2 | 2 |
| gonl-124a | 1 | 2 | 2 |
| gonl-124b | 1 | 2 | 2 |
| gonl-124c | 0 | 2 | 2 |
| gonl-125a | 1 | 2 | 2 |
| gonl-125b | 1 | 2 | 3 |
| gonl-125c | 0 | 2 | 3 |
| gonl-126a | 1 | 2 | 1 |
| gonl-126b | 1 | 2 | 2 |
| gonl-126c | 0 | 2 | 1 |
| gonl-127a | 1 | 2 | 2 |
| gonl-127b | 1 | 3 | 2 |
| gonl-127c | 0 | 3 | 2 |

|           |   |   |   |
|-----------|---|---|---|
| gonl-128a | 1 | 2 | 2 |
| gonl-128b | 1 | 2 | 2 |
| gonl-128c | 0 | 2 | 2 |
| gonl-129a | 1 | 2 | 2 |
| gonl-129b | 1 | 2 | 2 |
| gonl-129c | 0 | 2 | 2 |
| gonl-129d | 0 | 2 | 2 |
| gonl-12a  | 1 | 2 | 2 |
| gonl-12b  | 1 | 3 | 2 |
| gonl-12c  | 0 | 2 | 2 |
| gonl-130a | 1 | 3 | 2 |
| gonl-130b | 1 | 2 | 2 |
| gonl-130c | 0 | 3 | 2 |
| gonl-131a | 1 | 2 | 3 |
| gonl-131b | 1 | 2 | 2 |
| gonl-131c | 0 | 2 | 2 |
| gonl-132a | 1 | 2 | 2 |
| gonl-132b | 1 | 2 | 2 |
| gonl-132c | 0 | 2 | 2 |
| gonl-133a | 1 | 2 | 2 |
| gonl-133b | 1 | 2 | 3 |
| gonl-133c | 0 | 2 | 2 |
| gonl-134a | 1 | 2 | 1 |
| gonl-134b | 1 | 2 | 2 |
| gonl-134c | 0 | 2 | 1 |
| gonl-135a | 1 | 2 | 2 |
| gonl-135b | 1 | 3 | 2 |
| gonl-135c | 0 | 3 | 2 |
| gonl-136a | 1 | 2 | 2 |
| gonl-136b | 1 | 2 | 2 |
| gonl-136c | 0 | 2 | 2 |
| gonl-137a | 1 | 2 | 2 |
| gonl-137b | 1 | 2 | 1 |
| gonl-137c | 0 | 2 | 1 |
| gonl-138a | 1 | 2 | 2 |
| gonl-138b | 1 | 2 | 2 |
| gonl-138c | 0 | 2 | 2 |
| gonl-139a | 1 | 2 | 3 |
| gonl-139b | 0 | 2 | 2 |
| gonl-139c | 0 | 2 | 3 |
| gonl-13a  | 1 | 2 | 2 |
| gonl-13b  | 1 | 2 | 2 |
| gonl-13c  | 0 | 2 | 2 |
| gonl-140a | 1 | 2 | 2 |
| gonl-140b | 1 | 2 | 2 |
| gonl-140c | 0 | 2 | 2 |

|           |   |   |       |
|-----------|---|---|-------|
| gonl-141a | 1 | 2 | 2     |
| gonl-141b | 1 | 3 | 2     |
| gonl-141c | 0 | 3 | 2     |
| gonl-142a | 1 | 2 | 2     |
| gonl-142b | 1 | 2 | 2     |
| gonl-142c | 0 | 2 | 2     |
| gonl-143a | 1 | 2 | 2     |
| gonl-143b | 1 | 2 | 1     |
| gonl-143c | 0 | 2 | 2     |
| gonl-144a | 1 | 2 | 2     |
| gonl-144b | 0 | 2 | 1     |
| gonl-144c | 0 | 2 | 3     |
| gonl-145a | 1 | 2 | 2     |
| gonl-145b | 1 | 2 | 1     |
| gonl-145c | 0 | 2 | 1     |
| gonl-146a | 1 | 2 | 2     |
| gonl-146b | 1 | 2 | 2     |
| gonl-146c | 0 | 2 | 2     |
| gonl-147a | 1 | 2 | 2     |
| gonl-147b | 1 | 2 | 2     |
| gonl-147c | 0 | 2 | 2     |
| gonl-148a | 1 | 2 | 2     |
| gonl-148b | 1 | 2 | 2     |
| gonl-148c | 0 | 2 | 2     |
| gonl-149a | 1 | 2 | 2     |
| gonl-149b | 1 | 2 | 2     |
| gonl-149c | 0 | 2 | 2     |
| gonl-14a  | 1 | 2 | 2     |
| gonl-14b  | 1 | 2 | 2     |
| gonl-14c  | 0 | 2 | 2     |
| gonl-150a | 1 | 2 | 2     |
| gonl-150b | 1 | 3 | 3     |
| gonl-150c | 0 | 2 | 1 yes |
| gonl-151a | 1 | 3 | 2     |
| gonl-151b | 1 | 3 | 2     |
| gonl-151c | 0 | 3 | 2     |
| gonl-152a | 1 | 2 | 2     |
| gonl-152b | 1 | 2 | 2     |
| gonl-152c | 0 | 2 | 2     |
| gonl-153a | 1 | 2 | 3     |
| gonl-153b | 1 | 2 | 1     |
| gonl-153c | 0 | 2 | 1     |
| gonl-154a | 1 | 2 | 2     |
| gonl-154b | 1 | 2 | 2     |
| gonl-154c | 0 | 2 | 3     |
| gonl-155a | 1 | 2 | 2     |

|           |   |   |   |
|-----------|---|---|---|
| gonl-155b | 1 | 2 | 2 |
| gonl-155c | 0 | 2 | 2 |
| gonl-156a | 1 | 2 | 2 |
| gonl-156b | 1 | 2 | 2 |
| gonl-156c | 0 | 2 | 2 |
| gonl-157a | 1 | 2 | 2 |
| gonl-157b | 1 | 2 | 2 |
| gonl-157c | 0 | 2 | 2 |
| gonl-158a | 1 | 2 | 2 |
| gonl-158b | 1 | 2 | 3 |
| gonl-158c | 0 | 2 | 3 |
| gonl-159a | 1 | 2 | 3 |
| gonl-159b | 1 | 2 | 2 |
| gonl-159c | 0 | 2 | 3 |
| gonl-15a  | 1 | 2 | 2 |
| gonl-15b  | 1 | 2 | 3 |
| gonl-15c  | 0 | 2 | 2 |
| gonl-160a | 1 | 2 | 3 |
| gonl-160b | 1 | 2 | 2 |
| gonl-160c | 0 | 2 | 2 |
| gonl-161a | 1 | 2 | 3 |
| gonl-161b | 1 | 2 | 2 |
| gonl-161c | 0 | 2 | 3 |
| gonl-162a | 1 | 2 | 2 |
| gonl-162b | 1 | 2 | 2 |
| gonl-162c | 0 | 2 | 2 |
| gonl-163a | 1 | 2 | 2 |
| gonl-163b | 1 | 2 | 2 |
| gonl-163c | 0 | 2 | 2 |
| gonl-164a | 1 | 2 | 3 |
| gonl-164b | 1 | 2 | 1 |
| gonl-164c | 0 | 2 | 1 |
| gonl-165a | 1 | 2 | 2 |
| gonl-165b | 1 | 2 | 2 |
| gonl-165c | 0 | 2 | 2 |
| gonl-166a | 1 | 2 | 2 |
| gonl-166b | 1 | 2 | 2 |
| gonl-166c | 0 | 2 | 2 |
| gonl-167a | 1 | 3 | 3 |
| gonl-167b | 1 | 2 | 3 |
| gonl-167c | 0 | 3 | 3 |
| gonl-168a | 1 | 2 | 2 |
| gonl-168b | 1 | 2 | 2 |
| gonl-168c | 0 | 2 | 2 |
| gonl-169a | 1 | 2 | 2 |
| gonl-169b | 1 | 3 | 2 |

|           |   |   |   |
|-----------|---|---|---|
| gonl-169c | 0 | 3 | 2 |
| gonl-16a  | 1 | 2 | 2 |
| gonl-16b  | 1 | 2 | 2 |
| gonl-16c  | 0 | 2 | 2 |
| gonl-170a | 1 | 2 | 2 |
| gonl-170b | 1 | 3 | 2 |
| gonl-170c | 0 | 3 | 2 |
| gonl-171a | 1 | 2 | 2 |
| gonl-171b | 1 | 2 | 2 |
| gonl-171c | 0 | 2 | 2 |
| gonl-172a | 1 | 2 | 2 |
| gonl-172b | 1 | 2 | 2 |
| gonl-172c | 0 | 2 | 2 |
| gonl-173a | 1 | 2 | 2 |
| gonl-173b | 1 | 2 | 2 |
| gonl-173c | 0 | 2 | 2 |
| gonl-174a | 1 | 2 | 2 |
| gonl-174b | 1 | 2 | 3 |
| gonl-174c | 0 | 2 | 3 |
| gonl-175a | 1 | 2 | 3 |
| gonl-175b | 1 | 2 | 2 |
| gonl-175c | 0 | 2 | 2 |
| gonl-176a | 1 | 2 | 2 |
| gonl-176b | 1 | 2 | 1 |
| gonl-176c | 0 | 2 | 1 |
| gonl-177a | 1 | 2 | 2 |
| gonl-177b | 1 | 2 | 2 |
| gonl-177c | 0 | 2 | 2 |
| gonl-178a | 1 | 2 | 2 |
| gonl-178b | 1 | 2 | 2 |
| gonl-178c | 0 | 2 | 2 |
| gonl-179a | 1 | 1 | 3 |
| gonl-179b | 1 | 2 | 2 |
| gonl-179c | 0 | 2 | 2 |
| gonl-17a  | 1 | 2 | 1 |
| gonl-17b  | 1 | 2 | 2 |
| gonl-17c  | 0 | 2 | 1 |
| gonl-180a | 1 | 2 | 2 |
| gonl-180b | 1 | 2 | 2 |
| gonl-180c | 0 | 2 | 2 |
| gonl-181a | 1 | 2 | 2 |
| gonl-181b | 1 | 2 | 2 |
| gonl-181c | 0 | 2 | 2 |
| gonl-182a | 1 | 2 | 2 |
| gonl-182b | 1 | 2 | 2 |
| gonl-182c | 0 | 2 | 2 |

|           |   |   |   |
|-----------|---|---|---|
| gonl-183a | 1 | 2 | 2 |
| gonl-183b | 1 | 2 | 2 |
| gonl-183c | 0 | 2 | 2 |
| gonl-184a | 1 | 3 | 2 |
| gonl-184b | 1 | 3 | 2 |
| gonl-184c | 0 | 2 | 2 |
| gonl-185a | 1 | 2 | 1 |
| gonl-185b | 1 | 2 | 2 |
| gonl-185c | 0 | 2 | 1 |
| gonl-186a | 1 | 2 | 2 |
| gonl-186b | 1 | 2 | 2 |
| gonl-186c | 0 | 2 | 2 |
| gonl-187a | 1 | 2 | 2 |
| gonl-187b | 1 | 2 | 2 |
| gonl-187c | 0 | 2 | 2 |
| gonl-188a | 1 | 3 | 2 |
| gonl-188b | 1 | 2 | 2 |
| gonl-188c | 0 | 3 | 2 |
| gonl-189a | 1 | 3 | 2 |
| gonl-189b | 1 | 2 | 1 |
| gonl-189c | 0 | 2 | 2 |
| gonl-18a  | 1 | 2 | 2 |
| gonl-18b  | 1 | 2 | 2 |
| gonl-18c  | 0 | 2 | 2 |
| gonl-190a | 1 | 2 | 2 |
| gonl-190b | 1 | 2 | 2 |
| gonl-190c | 0 | 2 | 2 |
| gonl-191a | 1 | 2 | 2 |
| gonl-191b | 1 | 2 | 1 |
| gonl-191c | 0 | 2 | 1 |
| gonl-192a | 1 | 2 | 1 |
| gonl-192b | 1 | 2 | 2 |
| gonl-192c | 0 | 2 | 1 |
| gonl-193a | 1 | 2 | 2 |
| gonl-193b | 1 | 2 | 2 |
| gonl-193c | 0 | 2 | 2 |
| gonl-194a | 1 | 2 | 2 |
| gonl-194b | 1 | 2 | 2 |
| gonl-194c | 0 | 2 | 2 |
| gonl-195a | 1 | 3 | 2 |
| gonl-195b | 1 | 2 | 2 |
| gonl-195c | 0 | 3 | 2 |
| gonl-196a | 1 | 2 | 2 |
| gonl-196b | 1 | 2 | 2 |
| gonl-196c | 0 | 2 | 2 |
| gonl-197a | 1 | 2 | 2 |



|           |   |   |   |
|-----------|---|---|---|
| gonl-197b | 1 | 2 | 3 |
| gonl-197c | 0 | 2 | 2 |
| gonl-198a | 1 | 2 | 2 |
| gonl-198b | 1 | 2 | 2 |
| gonl-198c | 0 | 2 | 2 |
| gonl-199a | 1 | 2 | 2 |
| gonl-199b | 1 | 2 | 2 |
| gonl-199c | 0 | 2 | 2 |
| gonl-19a  | 1 | 2 | 2 |
| gonl-19b  | 1 | 2 | 2 |
| gonl-19c  | 0 | 2 | 2 |
| gonl-19d  | 0 | 2 | 2 |
| gonl-1a   | 1 | 2 | 2 |
| gonl-1b   | 1 | 2 | 2 |
| gonl-1c   | 0 | 2 | 2 |
| gonl-200a | 1 | 2 | 2 |
| gonl-200b | 1 | 2 | 2 |
| gonl-200c | 0 | 2 | 2 |
| gonl-201a | 1 | 2 | 2 |
| gonl-201b | 1 | 2 | 2 |
| gonl-201c | 0 | 2 | 2 |
| gonl-202a | 1 | 2 | 2 |
| gonl-202b | 1 | 2 | 2 |
| gonl-202c | 0 | 2 | 2 |
| gonl-204a | 1 | 2 | 2 |
| gonl-204b | 1 | 2 | 2 |
| gonl-204c | 0 | 2 | 2 |
| gonl-205a | 1 | 2 | 2 |
| gonl-205b | 1 | 2 | 2 |
| gonl-205c | 0 | 2 | 2 |
| gonl-206a | 1 | 3 | 2 |
| gonl-206b | 1 | 2 | 2 |
| gonl-206c | 0 | 2 | 2 |
| gonl-207a | 1 | 2 | 2 |
| gonl-207b | 1 | 2 | 2 |
| gonl-207c | 0 | 2 | 2 |
| gonl-208a | 1 | 2 | 2 |
| gonl-208b | 1 | 2 | 2 |
| gonl-208c | 0 | 2 | 2 |
| gonl-209a | 1 | 2 | 2 |
| gonl-209b | 1 | 2 | 2 |
| gonl-209c | 0 | 2 | 2 |
| gonl-20a  | 1 | 2 | 2 |
| gonl-20b  | 1 | 2 | 3 |
| gonl-20c  | 0 | 2 | 3 |
| gonl-20d  | 0 | 2 | 3 |

|           |   |   |   |
|-----------|---|---|---|
| gonl-210a | 1 | 2 | 2 |
| gonl-210b | 1 | 2 | 2 |
| gonl-210c | 0 | 2 | 2 |
| gonl-211a | 1 | 2 | 2 |
| gonl-211b | 1 | 2 | 2 |
| gonl-211c | 0 | 2 | 2 |
| gonl-212a | 1 | 2 | 1 |
| gonl-212b | 1 | 2 | 3 |
| gonl-212c | 0 | 2 | 2 |
| gonl-213a | 1 | 2 | 2 |
| gonl-213b | 1 | 2 | 2 |
| gonl-213c | 0 | 2 | 2 |
| gonl-214a | 1 | 2 | 2 |
| gonl-214b | 1 | 2 | 2 |
| gonl-214c | 0 | 2 | 2 |
| gonl-215a | 1 | 2 | 2 |
| gonl-215b | 1 | 2 | 2 |
| gonl-215c | 0 | 2 | 2 |
| gonl-216a | 1 | 2 | 2 |
| gonl-216b | 1 | 2 | 2 |
| gonl-216c | 0 | 2 | 2 |
| gonl-217a | 1 | 2 | 2 |
| gonl-217b | 1 | 2 | 1 |
| gonl-217c | 0 | 2 | 1 |
| gonl-218a | 1 | 3 | 2 |
| gonl-218b | 1 | 2 | 2 |
| gonl-218c | 0 | 3 | 2 |
| gonl-219a | 1 | 2 | 2 |
| gonl-219b | 1 | 2 | 1 |
| gonl-219c | 0 | 2 | 2 |
| gonl-219d | 0 | 2 | 1 |
| gonl-21a  | 0 | 2 | 2 |
| gonl-21c  | 0 | 2 | 2 |
| gonl-220a | 1 | 2 | 2 |
| gonl-220b | 1 | 2 | 2 |
| gonl-220c | 0 | 2 | 2 |
| gonl-221a | 1 | 2 | 2 |
| gonl-221b | 1 | 2 | 2 |
| gonl-221c | 0 | 2 | 2 |
| gonl-222a | 1 | 2 | 2 |
| gonl-222b | 1 | 2 | 2 |
| gonl-222c | 0 | 2 | 2 |
| gonl-223a | 1 | 2 | 2 |
| gonl-223b | 1 | 2 | 2 |
| gonl-223c | 0 | 2 | 2 |
| gonl-224a | 1 | 2 | 2 |

|           |   |   |   |
|-----------|---|---|---|
| gonl-224b | 1 | 2 | 2 |
| gonl-224c | 0 | 2 | 2 |
| gonl-225a | 1 | 2 | 3 |
| gonl-225b | 1 | 2 | 2 |
| gonl-225c | 0 | 2 | 3 |
| gonl-226a | 1 | 2 | 2 |
| gonl-226b | 1 | 2 | 3 |
| gonl-226c | 0 | 2 | 2 |
| gonl-227a | 1 | 2 | 3 |
| gonl-227b | 1 | 2 | 2 |
| gonl-227c | 0 | 2 | 2 |
| gonl-228a | 1 | 2 | 2 |
| gonl-228b | 1 | 2 | 2 |
| gonl-228c | 0 | 2 | 2 |
| gonl-229a | 1 | 2 | 2 |
| gonl-229b | 1 | 2 | 2 |
| gonl-229c | 0 | 2 | 2 |
| gonl-22a  | 1 | 2 | 1 |
| gonl-22b  | 1 | 2 | 2 |
| gonl-22c  | 0 | 2 | 2 |
| gonl-230a | 1 | 2 | 3 |
| gonl-230b | 1 | 2 | 2 |
| gonl-230c | 0 | 2 | 2 |
| gonl-231a | 1 | 2 | 2 |
| gonl-231b | 1 | 2 | 2 |
| gonl-231c | 0 | 2 | 2 |
| gonl-232a | 1 | 2 | 2 |
| gonl-232b | 1 | 2 | 3 |
| gonl-232c | 0 | 2 | 2 |
| gonl-233a | 1 | 2 | 3 |
| gonl-233b | 1 | 2 | 2 |
| gonl-233c | 0 | 2 | 3 |
| gonl-234a | 1 | 2 | 2 |
| gonl-234b | 1 | 2 | 2 |
| gonl-234c | 0 | 2 | 2 |
| gonl-235a | 1 | 2 | 2 |
| gonl-235b | 1 | 2 | 2 |
| gonl-235c | 0 | 2 | 2 |
| gonl-236a | 1 | 2 | 2 |
| gonl-236b | 1 | 2 | 2 |
| gonl-236c | 0 | 2 | 2 |
| gonl-237a | 1 | 2 | 2 |
| gonl-237b | 1 | 2 | 2 |
| gonl-237c | 0 | 2 | 2 |
| gonl-238a | 1 | 3 | 1 |
| gonl-238b | 1 | 3 | 2 |

|           |   |   |   |
|-----------|---|---|---|
| gonl-238c | 0 | 2 | 1 |
| gonl-239a | 1 | 2 | 2 |
| gonl-239b | 1 | 3 | 2 |
| gonl-239c | 0 | 2 | 2 |
| gonl-239d | 0 | 2 | 2 |
| gonl-23a  | 1 | 2 | 2 |
| gonl-23b  | 1 | 2 | 2 |
| gonl-23c  | 0 | 2 | 2 |
| gonl-240a | 1 | 2 | 2 |
| gonl-240b | 1 | 2 | 2 |
| gonl-240c | 0 | 2 | 2 |
| gonl-241a | 1 | 2 | 3 |
| gonl-241b | 1 | 2 | 2 |
| gonl-241c | 0 | 2 | 2 |
| gonl-242a | 1 | 2 | 1 |
| gonl-242b | 1 | 2 | 2 |
| gonl-242c | 0 | 2 | 2 |
| gonl-243a | 1 | 2 | 2 |
| gonl-243b | 1 | 2 | 2 |
| gonl-243c | 0 | 2 | 2 |
| gonl-244a | 1 | 2 | 2 |
| gonl-244b | 1 | 2 | 2 |
| gonl-244c | 0 | 2 | 2 |
| gonl-245a | 1 | 3 | 2 |
| gonl-245b | 1 | 2 | 2 |
| gonl-245c | 0 | 3 | 2 |
| gonl-246a | 1 | 2 | 1 |
| gonl-246b | 1 | 2 | 2 |
| gonl-246c | 0 | 2 | 1 |
| gonl-247a | 0 | 2 | 2 |
| gonl-247a | 1 | 2 | 2 |
| gonl-247b | 1 | 2 | 2 |
| gonl-247c | 0 | 2 | 2 |
| gonl-248a | 1 | 2 | 2 |
| gonl-248b | 1 | 2 | 2 |
| gonl-248c | 0 | 2 | 2 |
| gonl-248d | 0 | 2 | 2 |
| gonl-249a | 1 | 2 | 2 |
| gonl-249b | 1 | 2 | 2 |
| gonl-249c | 0 | 2 | 2 |
| gonl-24a  | 1 | 1 | 1 |
| gonl-24b  | 1 | 2 | 2 |
| gonl-24c  | 0 | 1 | 2 |
| gonl-250a | 1 | 2 | 2 |
| gonl-250b | 1 | 2 | 2 |
| gonl-250c | 0 | 2 | 2 |

|           |   |   |   |
|-----------|---|---|---|
| gonl-251a | 1 | 2 | 2 |
| gonl-251b | 1 | 2 | 2 |
| gonl-251c | 0 | 2 | 2 |
| gonl-252b | 1 | 2 | 3 |
| gonl-253a | 1 | 3 | 2 |
| gonl-253b | 1 | 2 | 2 |
| gonl-253c | 0 | 3 | 2 |
| gonl-254b | 1 | 2 | 2 |
| gonl-254c | 0 | 2 | 2 |
| gonl-255a | 1 | 2 | 2 |
| gonl-255b | 1 | 2 | 2 |
| gonl-255c | 0 | 2 | 2 |
| gonl-256a | 1 | 2 | 2 |
| gonl-256b | 1 | 2 | 2 |
| gonl-256c | 0 | 2 | 2 |
| gonl-257a | 1 | 2 | 2 |
| gonl-257b | 1 | 2 | 2 |
| gonl-257c | 0 | 2 | 2 |
| gonl-25a  | 1 | 2 | 2 |
| gonl-25b  | 1 | 3 | 2 |
| gonl-25c  | 0 | 3 | 2 |
| gonl-26a  | 1 | 2 | 2 |
| gonl-26b  | 1 | 2 | 2 |
| gonl-26c  | 0 | 2 | 2 |
| gonl-27a  | 1 | 2 | 2 |
| gonl-27b  | 1 | 2 | 2 |
| gonl-27c  | 0 | 2 | 2 |
| gonl-28a  | 1 | 1 | 2 |
| gonl-28b  | 1 | 2 | 2 |
| gonl-28c  | 0 | 2 | 2 |
| gonl-29a  | 1 | 2 | 2 |
| gonl-29b  | 1 | 2 | 2 |
| gonl-29c  | 0 | 2 | 2 |
| gonl-2a   | 1 | 2 | 2 |
| gonl-2b   | 1 | 2 | 2 |
| gonl-2c   | 0 | 2 | 2 |
| gonl-30a  | 1 | 2 | 2 |
| gonl-30b  | 1 | 2 | 2 |
| gonl-30c  | 0 | 2 | 2 |
| gonl-31a  | 1 | 2 | 2 |
| gonl-31b  | 1 | 3 | 3 |
| gonl-31c  | 0 | 3 | 2 |
| gonl-32a  | 1 | 2 | 2 |
| gonl-32b  | 1 | 2 | 2 |
| gonl-32c  | 0 | 2 | 2 |
| gonl-33a  | 1 | 2 | 2 |

|          |   |            |   |
|----------|---|------------|---|
| gonl-33b | 1 | 2          | 2 |
| gonl-33c | 0 | 2          | 2 |
| gonl-34a | 1 | 2          | 2 |
| gonl-34b | 1 | 2          | 2 |
| gonl-34c | 0 | 2          | 2 |
| gonl-35a | 1 | 2          | 2 |
| gonl-35b | 1 | 2          | 2 |
| gonl-35c | 0 | 2          | 2 |
| gonl-36a | 1 | 2          | 3 |
| gonl-36b | 1 | 2          | 2 |
| gonl-36c | 0 | 2          | 2 |
| gonl-37a | 1 | 2          | 3 |
| gonl-37b | 1 | 2          | 2 |
| gonl-37c | 0 | 2          | 2 |
| gonl-38a | 1 | 2          | 3 |
| gonl-38b | 1 | 2          | 2 |
| gonl-38c | 0 | 2          | 3 |
| gonl-39a | 1 | 3          | 2 |
| gonl-39b | 1 | 2          | 2 |
| gonl-39c | 0 | 2          | 2 |
| gonl-3a  | 1 | 2          | 2 |
| gonl-3b  | 1 | 2          | 2 |
| gonl-3c  | 0 | 2 excluded |   |
| gonl-40a | 1 | 2          | 2 |
| gonl-40b | 1 | 1          | 2 |
| gonl-40c | 0 | 1          | 2 |
| gonl-41a | 1 | 2          | 2 |
| gonl-41b | 1 | 2          | 2 |
| gonl-41c | 0 | 2          | 2 |
| gonl-41d | 0 | 2          | 2 |
| gonl-42a | 1 | 2          | 2 |
| gonl-42b | 1 | 2          | 2 |
| gonl-42c | 0 | 2          | 2 |
| gonl-43a | 1 | 2          | 2 |
| gonl-43b | 1 | 2          | 2 |
| gonl-43c | 0 | 2          | 2 |
| gonl-44a | 1 | 2          | 2 |
| gonl-44b | 1 | 2          | 2 |
| gonl-44c | 0 | 2          | 2 |
| gonl-45a | 1 | 2          | 2 |
| gonl-45b | 1 | 3          | 3 |
| gonl-45c | 0 | 2          | 2 |
| gonl-46a | 1 | 3          | 1 |
| gonl-46b | 1 | 2          | 2 |
| gonl-46c | 0 | 3          | 1 |
| gonl-47a | 1 | 2          | 2 |

|          |   |   |       |
|----------|---|---|-------|
| gonl-47b | 1 | 2 | 2     |
| gonl-47c | 0 | 2 | 2     |
| gonl-48a | 1 | 2 | 2     |
| gonl-48b | 1 | 2 | 2     |
| gonl-48c | 0 | 2 | 2     |
| gonl-49a | 1 | 2 | 2     |
| gonl-49b | 1 | 2 | 2     |
| gonl-49c | 0 | 2 | 2     |
| gonl-4a  | 1 | 2 | 1     |
| gonl-4b  | 1 | 2 | 2     |
| gonl-4c  | 0 | 2 | 1     |
| gonl-50a | 1 | 2 | 2     |
| gonl-50b | 1 | 3 | 2     |
| gonl-50c | 0 | 2 | 2     |
| gonl-51a | 1 | 2 | 2     |
| gonl-51b | 1 | 2 | 2     |
| gonl-51c | 0 | 2 | 2     |
| gonl-51d | 0 | 2 | 2     |
| gonl-52a | 1 | 2 | 2     |
| gonl-52b | 1 | 2 | 2     |
| gonl-52c | 0 | 2 | 2     |
| gonl-53a | 1 | 2 | 2     |
| gonl-53b | 1 | 2 | 2     |
| gonl-53c | 0 | 2 | 2     |
| gonl-54a | 1 | 2 | 3     |
| gonl-54b | 1 | 2 | 2     |
| gonl-54c | 0 | 2 | 2     |
| gonl-55a | 1 | 2 | 2     |
| gonl-55b | 1 | 2 | 2     |
| gonl-55c | 0 | 2 | 2     |
| gonl-56a | 1 | 2 | 2     |
| gonl-56b | 1 | 2 | 2     |
| gonl-56c | 0 | 2 | 3 yes |
| gonl-57a | 1 | 2 | 2     |
| gonl-57b | 1 | 2 | 2     |
| gonl-57c | 0 | 2 | 2     |
| gonl-58a | 1 | 2 | 2     |
| gonl-58b | 1 | 2 | 2     |
| gonl-58c | 0 | 2 | 2     |
| gonl-59a | 1 | 2 | 3     |
| gonl-59b | 1 | 2 | 3     |
| gonl-59c | 0 | 2 | 2     |
| gonl-5a  | 1 | 2 | 2     |
| gonl-5b  | 1 | 2 | 3     |
| gonl-5c  | 0 | 2 | 2     |
| gonl-60a | 1 | 2 | 2     |

|          |   |   |   |
|----------|---|---|---|
| gonl-60b | 1 | 2 | 2 |
| gonl-60c | 0 | 2 | 2 |
| gonl-61a | 1 | 2 | 3 |
| gonl-61b | 1 | 2 | 2 |
| gonl-61c | 0 | 2 | 3 |
| gonl-62a | 1 | 2 | 2 |
| gonl-62b | 1 | 2 | 2 |
| gonl-62c | 0 | 2 | 2 |
| gonl-63a | 1 | 2 | 2 |
| gonl-63b | 1 | 2 | 2 |
| gonl-63c | 0 | 2 | 2 |
| gonl-64a | 1 | 2 | 2 |
| gonl-64b | 1 | 2 | 2 |
| gonl-64c | 0 | 2 | 2 |
| gonl-65a | 1 | 2 | 2 |
| gonl-65b | 1 | 2 | 2 |
| gonl-65c | 0 | 2 | 2 |
| gonl-66a | 1 | 2 | 2 |
| gonl-66b | 1 | 2 | 2 |
| gonl-66c | 0 | 2 | 2 |
| gonl-67a | 1 | 2 | 2 |
| gonl-67b | 1 | 2 | 2 |
| gonl-67c | 0 | 2 | 2 |
| gonl-68a | 1 | 2 | 1 |
| gonl-68b | 1 | 2 | 2 |
| gonl-68c | 0 | 2 | 2 |
| gonl-69a | 1 | 2 | 1 |
| gonl-69b | 1 | 2 | 2 |
| gonl-69c | 0 | 2 | 1 |
| gonl-6a  | 1 | 2 | 2 |
| gonl-6b  | 1 | 2 | 2 |
| gonl-6c  | 0 | 2 | 2 |
| gonl-70a | 1 | 2 | 2 |
| gonl-70b | 1 | 2 | 2 |
| gonl-70c | 0 | 2 | 2 |
| gonl-71a | 1 | 2 | 2 |
| gonl-71b | 1 | 2 | 2 |
| gonl-71c | 0 | 2 | 2 |
| gonl-72a | 1 | 2 | 2 |
| gonl-72b | 1 | 2 | 2 |
| gonl-72c | 0 | 2 | 2 |
| gonl-73a | 1 | 2 | 1 |
| gonl-73b | 1 | 2 | 2 |
| gonl-73c | 0 | 2 | 1 |
| gonl-74a | 1 | 2 | 2 |
| gonl-74b | 1 | 2 | 1 |



|          |   |   |   |
|----------|---|---|---|
| gonl-74c | 0 | 2 | 1 |
| gonl-75a | 1 | 2 | 2 |
| gonl-75b | 0 | 2 | 2 |
| gonl-75c | 0 | 2 | 2 |
| gonl-76a | 1 | 2 | 2 |
| gonl-76b | 1 | 2 | 2 |
| gonl-76c | 0 | 2 | 2 |
| gonl-77a | 1 | 2 | 1 |
| gonl-77b | 1 | 2 | 2 |
| gonl-77c | 0 | 2 | 2 |
| gonl-78a | 1 | 2 | 2 |
| gonl-78b | 1 | 2 | 2 |
| gonl-78c | 0 | 2 | 2 |
| gonl-79a | 1 | 2 | 2 |
| gonl-79b | 1 | 2 | 2 |
| gonl-79c | 0 | 2 | 2 |
| gonl-7a  | 1 | 2 | 2 |
| gonl-7b  | 1 | 2 | 2 |
| gonl-7c  | 0 | 2 | 2 |
| gonl-7d  | 0 | 2 | 2 |
| gonl-80a | 1 | 2 | 2 |
| gonl-80b | 1 | 2 | 2 |
| gonl-80c | 0 | 2 | 2 |
| gonl-81a | 1 | 2 | 2 |
| gonl-81b | 1 | 2 | 2 |
| gonl-81c | 0 | 2 | 2 |
| gonl-82a | 1 | 2 | 2 |
| gonl-82b | 1 | 2 | 2 |
| gonl-82c | 0 | 2 | 2 |
| gonl-83a | 1 | 2 | 2 |
| gonl-83b | 1 | 2 | 2 |
| gonl-83c | 0 | 2 | 2 |
| gonl-84a | 1 | 2 | 2 |
| gonl-84b | 1 | 2 | 2 |
| gonl-84c | 0 | 2 | 2 |
| gonl-85a | 1 | 2 | 3 |
| gonl-85b | 1 | 2 | 2 |
| gonl-85c | 0 | 2 | 2 |
| gonl-86a | 1 | 2 | 2 |
| gonl-86b | 1 | 2 | 2 |
| gonl-86c | 0 | 2 | 2 |
| gonl-87a | 1 | 2 | 2 |
| gonl-87b | 1 | 2 | 2 |
| gonl-87c | 0 | 2 | 2 |
| gonl-88a | 1 | 2 | 2 |
| gonl-88b | 1 | 2 | 2 |

|          |   |   |   |
|----------|---|---|---|
| gonl-88c | 0 | 2 | 2 |
| gonl-89a | 1 | 2 | 2 |
| gonl-89b | 1 | 2 | 2 |
| gonl-89c | 0 | 2 | 2 |
| gonl-8a  | 1 | 2 | 2 |
| gonl-8b  | 1 | 1 | 2 |
| gonl-8c  | 0 | 2 | 2 |
| gonl-90a | 1 | 2 | 2 |
| gonl-90b | 1 | 1 | 2 |
| gonl-90c | 0 | 1 | 2 |
| gonl-91a | 1 | 2 | 1 |
| gonl-91b | 1 | 2 | 2 |
| gonl-91c | 0 | 2 | 2 |
| gonl-92a | 1 | 2 | 2 |
| gonl-92b | 1 | 2 | 2 |
| gonl-92c | 0 | 2 | 2 |
| gonl-93a | 1 | 2 | 2 |
| gonl-93b | 1 | 2 | 2 |
| gonl-93c | 0 | 2 | 2 |
| gonl-94a | 1 | 2 | 2 |
| gonl-94b | 1 | 2 | 2 |
| gonl-94c | 0 | 2 | 2 |
| gonl-95a | 1 | 2 | 2 |
| gonl-95b | 1 | 2 | 2 |
| gonl-95c | 0 | 2 | 2 |
| gonl-96a | 1 | 2 | 2 |
| gonl-96b | 1 | 2 | 2 |
| gonl-96c | 0 | 2 | 2 |
| gonl-96d | 0 | 2 | 2 |
| gonl-97a | 1 | 2 | 2 |
| gonl-97b | 1 | 2 | 2 |
| gonl-97c | 0 | 2 | 2 |
| gonl-98a | 1 | 2 | 2 |
| gonl-98b | 0 | 2 | 3 |
| gonl-98c | 0 | 2 | 2 |
| gonl-99a | 1 | 2 | 1 |
| gonl-99b | 1 | 3 | 2 |
| gonl-99c | 0 | 2 | 1 |
| gonl-9a  | 1 | 2 | 2 |
| gonl-9b  | 1 | 2 | 2 |
| gonl-9c  | 0 | 2 | 2 |

Supplemental table 5. Correlation of PCA based estimation of CNVs and arrayCGH results.

| ID_CGH | PC-3 (X) | PC-1 (Y) | CNV FCGR3A | CNV FCGR3B | CNV FCGR3A&3B | CNV arrayCGH |
|--------|----------|----------|------------|------------|---------------|--------------|
| CGH1   | 29.76    | 73.36    | 2          | 0          | 2             | 2/4          |
| CGH19  | 8.56     | 38.28    | 2          | 1          | 3             | 3/4          |
| CGH9   | 7.84     | 34.53    | 2          | 1          | 3             | 3/4          |
| CGH6   | -28.21   | 32.13    | 1          | 2          | 3             | 3/4          |
| CGH8   | -26.59   | 30.38    | 1          | 2          | 3             | 3/4          |
| CGH11  | 0.35     | 7.02     | 2          | 2          | 4             | 4/4          |
| CGH2   | -4.37    | 4.19     | 2          | 2          | 4             | 4/4          |
| CGH10  | 25.36    | 2.67     | 3          | 1          | 4             | 4/4          |
| CGH12  | -1.61    | 0.33     | 2          | 2          | 4             | 4/4          |
| CGH7   | -3.73    | -1.36    | 2          | 2          | 4             | 4/4          |
| CGH15  | -3.07    | -1.77    | 2          | 2          | 4             | 4/4          |
| CGH13  | 12.3     | -16.47   | ≥3         | 2          | ≥5            | 5/4          |
| CGH16  | -7.55    | -17.37   | 2          | ≥3         | ≥5            | 5/4          |
| CGH3   | 14.9     | -18.42   | ≥3         | 2          | ≥5            | 5/4          |
| CGH5   | -7.61    | -21.09   | 2          | ≥3         | ≥5            | 5/4          |
| CGH4   | 15.43    | -22.13   | ≥3         | 2          | ≥5            | 5/4          |
| CGH14  | -4.69    | -23.29   | 2          | ≥3         | ≥5            | 5/4          |
| CGH17  | -9.09    | -24.67   | 2          | ≥3         | ≥5            | 5/4          |
| CGH18  | -9.78    | -24.88   | 2          | ≥3         | ≥5            | 5/4          |
| CGH20  | 11.22    | -39.85   | ≥3         | ≥3         | ≥5            | 6/4          |
| CGH22  | 9.84     | -46.07   | ≥3         | ≥3         | ≥5            | 6/4          |
| CGH21  | -18.01   | -65.21   | 2          | ≥3         | ≥5            | 6/4          |

CNV *FCGR3A*, CNV *FCGR3B*, CNV *FCGR3A + FCGR3B* – the number of copies of *FCGR3A*, *FCGR3B* and *FCGR3A + FCGR3B* blocks analysis, respectively, based on PC analysis. CNV arrayCGH – estimation of CNV by ArrayCGH analysis (the average number of copies is 4). PC-3 (X), PC-1 (Y) - the value of the third and first principal component for FCGR blocks analysis respectively. Individual CGH21 most likely has 4 copies of *FCGR3B* block (coordinates of this sample on figure 3 are (x=-18,0 y=-65.2)).

f

Supplemental table 6. Correlation of PCA-based estimations of CNVs and NGS results

| Sample ID | PC-3 (X) | PC-1 (Y) | <i>FCGR3A</i> | <i>FCGR3A</i> | <i>FCGR3B</i> | <i>FCGR3B</i> |
|-----------|----------|----------|---------------|---------------|---------------|---------------|
|           |          |          | CNV_PCA       | CNV_NGS       | CNV_PCA       | CNV_NGS       |
| gonl-31b  | 17.66    | -52.54   | ≥3            | 4             | ≥3            | 3             |
| gonl-46a  | 21.65    | 0.86     | ≥3            | 3             | 1             | 1             |
| gonl-238a | 25.81    | 2.71     | ≥3            | 3             | 1             | 1             |
| gonl-150b | 7.28     | -42.44   | ≥3            | 3             | ≥3            | 3             |
| gonl-184b | 16.99    | -24.02   | ≥3            | 3             | 2             | 2             |
| gonl-245a | 17.65    | -26.06   | ≥3            | 3             | 2             | 2             |
| gonl-122b | 27.08    | 76.11    | 2             | 2             | 0             | 0             |
| gonl-55a  | -6.29    | -2.34    | 2             | 2             | 2             | 2             |
| gonl-116a | 0.7      | 31.55    | 2             | 2             | 1             | 1             |
| gonl-227a | -6.94    | -41.61   | 2             | 2             | ≥3            | 4             |
| gonl-54a  | -6.68    | -23.82   | 2             | 2             | ≥3            | 3             |
| gonl-114c | -6.02    | -44.21   | 2             | 2             | ≥3            | 4             |
| gonl-61a  | -6.89    | -40.81   | 2             | 2             | ≥3            | 4             |
| gonl-175b | -1.96    | -5.92    | 2             | 2             | 2             | 2             |
| gonl-114b | -7.73    | -42.32   | 2             | 2             | ≥3            | 4             |
| gonl-107b | 9.41     | 30.8     | 2             | 2             | 1             | 1             |
| gonl-24a  | -13.73   | 75.59    | 1             | 1             | 1             | 1             |
| gonl-8b   | -27.86   | 32.91    | 1             | 1             | 2             | 2             |
| gonl-90b  | -22.32   | 31.51    | 1             | 1             | 2             | 2             |
| gonl-179a | -28.58   | 1.41     | 1             | 1             | ≥3            | 3             |

*FCGR3A CNV\_PCA*, *FCGR3B CNV\_PCA* – the number of copies of *FCGR3A* and *FCGR3B* blocks analysis, respectively, based on PC analysis. *FCGR3A CNV\_NGS*, *FCGR3B CNV\_NGS* – the number of copies of *FCGR3A* and *FCGR3B* blocks analysis, respectively, based on next-generation sequencing analysis. PC-3 (X), PC-1 (Y) - the value of the third and first principal component for *FCGR* blocks analysis respectively.

Supplemental table 7. Results of association analysis of *FCGR3A* CNV.

| disease | popul ation | status    | freq  |       | freq     |       | p-value | OR    | Cilow | Cihigh |
|---------|-------------|-----------|-------|-------|----------|-------|---------|-------|-------|--------|
|         |             |           | cases | cases | controls | contr |         |       |       |        |
| CeD     | NL          | FCGR3A_<2 | 16    | 0.014 | 18       | 0.013 | 0.677   | 1.162 | 0.596 | 2.268  |
|         |             | FCGR3A_2  | 1032  | 0.931 | 1341     | 0.940 |         |       |       |        |
|         |             | FCGR3A_>2 | 61    | 0.055 | 67       | 0.047 | 0.355   | 1.184 | 0.831 | 1.689  |
|         | IN          | FCGR3A_<2 | 1     | 0.004 | 8        | 0.021 | 0.166   | 0.214 | 0.005 | 1.616  |
|         |             | FCGR3A_2  | 214   | 0.955 | 366      | 0.941 |         |       |       |        |
|         |             | FCGR3A_>2 | 9     | 0.040 | 15       | 0.039 | 0.952   | 1.026 | 0.389 | 2.553  |
|         | IT          | FCGR3A_<2 | 19    | 0.014 | 20       | 0.016 | 0.747   | 0.865 | 0.435 | 1.718  |
|         |             | FCGR3A_2  | 1292  | 0.942 | 1177     | 0.938 |         |       |       |        |
|         |             | FCGR3A_>2 | 60    | 0.044 | 58       | 0.046 | 0.778   | 0.942 | 0.640 | 1.389  |
|         | PL          | FCGR3A_<2 | 12    | 0.024 | 4        | 0.008 | 0.044   | 3.156 | 0.948 | 13.516 |
|         |             | FCGR3A_2  | 472   | 0.937 | 497      | 0.934 |         |       |       |        |
|         |             | FCGR3A_>2 | 20    | 0.040 | 31       | 0.058 | 0.198   | 0.680 | 0.362 | 1.250  |
|         | SP          | FCGR3A_<2 | 11    | 0.020 | 6        | 0.020 | 0.972   | 1.018 | 0.341 | 3.390  |
|         |             | FCGR3A_2  | 506   | 0.937 | 281      | 0.918 |         |       |       |        |
|         |             | FCGR3A_>2 | 23    | 0.043 | 19       | 0.062 | 0.249   | 0.673 | 0.344 | 1.331  |
| IBD     | NL          | FCGR3A_<2 | 20    | 0.014 | 18       | 0.013 | 0.830   | 1.067 | 0.567 | 2.010  |
|         |             | FCGR3A_2  | 1389  | 0.942 | 1341     | 0.940 |         |       |       |        |
|         |             | FCGR3A_>2 | 65    | 0.044 | 67       | 0.047 | 0.713   | 0.937 | 0.662 | 1.327  |
| CrD     | NL          | FCGR3A_<2 | 13    | 0.014 | 18       | 0.013 | 0.705   | 1.172 | 0.578 | 2.376  |
|         |             | FCGR3A_2  | 843   | 0.938 | 1341     | 0.940 |         |       |       |        |
|         |             | FCGR3A_>2 | 43    | 0.048 | 67       | 0.047 | 0.918   | 1.029 | 0.696 | 1.521  |
| UC      | NL          | FCGR3A_<2 | 7     | 0.012 | 18       | 0.013 | 0.918   | 1.033 | 0.440 | 2.427  |
|         |             | FCGR3A_2  | 546   | 0.950 | 1341     | 0.940 |         |       |       |        |
|         |             | FCGR3A_>2 | 22    | 0.038 | 67       | 0.047 | 0.390   | 0.830 | 0.510 | 1.351  |
| RA_all  | NL          | FCGR3A_<2 | 6     | 0.009 | 18       | 0.013 | 0.510   | 0.809 | 0.329 | 1.988  |
|         |             | FCGR3A_2  | 610   | 0.941 | 1341     | 0.940 |         |       |       |        |
|         |             | FCGR3A_>2 | 32    | 0.049 | 67       | 0.047 | 0.825   | 1.066 | 0.694 | 1.637  |
|         | SW          | FCGR3A_<2 | 11    | 0.016 | 21       | 0.022 | 0.471   | 0.731 | 0.316 | 1.600  |
|         |             | FCGR3A_2  | 627   | 0.929 | 875      | 0.931 |         |       |       |        |
|         |             | FCGR3A_>2 | 37    | 0.055 | 44       | 0.047 | 0.490   | 1.173 | 0.728 | 1.884  |
|         | US          | FCGR3A_<2 | 28    | 0.013 | 24       | 0.019 | 0.145   | 0.649 | 0.361 | 1.176  |
|         |             | FCGR3A_2  | 2086  | 0.936 | 1161     | 0.917 |         |       |       |        |
|         |             | FCGR3A_>2 | 115   | 0.052 | 81       | 0.064 | 0.125   | 0.790 | 0.584 | 1.074  |
|         | S_Bost      | FCGR3A_<2 | 21    | 0.021 | 29       | 0.016 | 0.373   | 1.308 | 0.705 | 2.389  |
|         |             | FCGR3A_2  | 954   | 0.943 | 1723     | 0.930 |         |       |       |        |
|         |             | FCGR3A_>2 | 37    | 0.037 | 100      | 0.054 | 0.043   | 0.668 | 0.442 | 0.993  |
|         | NL          | FCGR3A_<2 | 4     | 0.012 | 18       | 0.013 | 0.921   | 1.118 | 0.396 | 3.154  |
|         |             | FCGR3A_2  | 315   | 0.949 | 1341     | 0.940 |         |       |       |        |
|         |             | FCGR3A_>2 | 13    | 0.039 | 67       | 0.047 | 0.536   | 0.874 | 0.481 | 1.589  |
|         | SW          | FCGR3A_<2 | 8     | 0.020 | 21       | 0.022 | 0.841   | 0.887 | 0.336 | 2.107  |
|         |             | FCGR3A_2  | 376   | 0.926 | 875      | 0.931 |         |       |       |        |

|         |        |           |      |       |      |       |       |       |       |       |
|---------|--------|-----------|------|-------|------|-------|-------|-------|-------|-------|
| A_CCpoc | US     | FCGR3A_>2 | 22   | 0.054 | 44   | 0.047 | 0.583 | 1.163 | 0.654 | 2.016 |
|         |        | FCGR3A_<2 | 19   | 0.012 | 24   | 0.019 | 0.163 | 0.631 | 0.325 | 1.208 |
|         |        | FCGR3A_2  | 1457 | 0.933 | 1161 | 0.917 |       |       |       |       |
|         | S_Bost | FCGR3A_>2 | 85   | 0.054 | 81   | 0.064 | 0.295 | 0.836 | 0.603 | 1.160 |
|         |        | FCGR3A_<2 | 21   | 0.021 | 29   | 0.016 | 0.371 | 1.323 | 0.713 | 2.417 |
|         |        | FCGR3A_2  | 943  | 0.942 | 1723 | 0.930 |       |       |       |       |
| A_CCpne | NL     | FCGR3A_>2 | 37   | 0.037 | 100  | 0.054 | 0.053 | 0.676 | 0.447 | 1.004 |
|         |        | FCGR3A_<2 | 2    | 0.007 | 18   | 0.013 | 0.389 | 0.751 | 0.199 | 2.832 |
|         |        | FCGR3A_2  | 281  | 0.937 | 1341 | 0.940 |       |       |       |       |
|         | SW     | FCGR3A_>2 | 17   | 0.057 | 67   | 0.047 | 0.493 | 1.260 | 0.733 | 2.164 |
|         |        | FCGR3A_<2 | 3    | 0.016 | 21   | 0.022 | 0.784 | 0.710 | 0.134 | 2.418 |
|         |        | FCGR3A_2  | 176  | 0.926 | 875  | 0.931 |       |       |       |       |
|         | US     | FCGR3A_>2 | 11   | 0.058 | 44   | 0.047 | 0.579 | 1.243 | 0.567 | 2.505 |
|         |        | FCGR3A_<2 | 9    | 0.017 | 24   | 0.019 | 0.849 | 0.878 | 0.356 | 1.973 |
|         |        | FCGR3A_2  | 496  | 0.939 | 1161 | 0.917 |       |       |       |       |
|         |        | FCGR3A_>2 | 23   | 0.044 | 81   | 0.064 | 0.097 | 0.665 | 0.394 | 1.082 |

Supplemental table 8. Results of association analysis of *FCGR3B* CNV.

| disease | popul<br>ation | status    | freq  |       | freq     |       | p-value | OR    | Cilow | Cihigh |
|---------|----------------|-----------|-------|-------|----------|-------|---------|-------|-------|--------|
|         |                |           | cases | cases | controls | contr |         |       |       |        |
| CeD     | NL             | FCGR3B_<2 | 77    | 0.069 | 83       | 0.058 | 0.158   | 1.261 | 0.915 | 1.738  |
|         |                | FCGR3B_2  | 893   | 0.805 | 1213     | 0.851 |         |       |       |        |
|         |                | FCGR3B_>2 | 139   | 0.125 | 130      | 0.091 | 0.004   | 1.451 | 1.126 | 1.871  |
|         | IN             | FCGR3B_<2 | 25    | 0.112 | 34       | 0.087 | 0.315   | 1.352 | 0.747 | 2.422  |
|         |                | FCGR3B_2  | 169   | 0.754 | 311      | 0.799 |         |       |       |        |
|         |                | FCGR3B_>2 | 30    | 0.134 | 44       | 0.113 | 0.435   | 1.254 | 0.732 | 2.125  |
|         | IT             | FCGR3B_<2 | 114   | 0.083 | 139      | 0.111 | 0.017   | 0.723 | 0.551 | 0.947  |
|         |                | FCGR3B_2  | 1163  | 0.848 | 1025     | 0.817 |         |       |       |        |
|         |                | FCGR3B_>2 | 94    | 0.069 | 91       | 0.073 | 0.541   | 0.910 | 0.667 | 1.244  |
|         | PL             | FCGR3B_<2 | 38    | 0.075 | 29       | 0.055 | 0.162   | 1.457 | 0.857 | 2.499  |
|         |                | FCGR3B_2  | 400   | 0.794 | 445      | 0.836 |         |       |       |        |
|         |                | FCGR3B_>2 | 66    | 0.131 | 58       | 0.109 | 0.248   | 1.266 | 0.853 | 1.883  |
|         | SP             | FCGR3B_<2 | 63    | 0.117 | 26       | 0.085 | 0.238   | 1.370 | 0.830 | 2.318  |
|         |                | FCGR3B_2  | 433   | 0.802 | 245      | 0.801 |         |       |       |        |
|         |                | FCGR3B_>2 | 44    | 0.081 | 35       | 0.114 | 0.176   | 0.712 | 0.433 | 1.176  |
| IBD     | NL             | FCGR3B_<2 | 106   | 0.072 | 83       | 0.058 | 0.111   | 1.271 | 0.944 | 1.711  |
|         |                | FCGR3B_2  | 1216  | 0.825 | 1213     | 0.851 |         |       |       |        |
|         |                | FCGR3B_>2 | 152   | 0.103 | 130      | 0.091 | 0.222   | 1.165 | 0.910 | 1.491  |
| CrD     | NL             | FCGR3B_<2 | 68    | 0.076 | 83       | 0.058 | 0.082   | 1.346 | 0.965 | 1.876  |
|         |                | FCGR3B_2  | 740   | 0.823 | 1213     | 0.851 |         |       |       |        |
|         |                | FCGR3B_>2 | 91    | 0.101 | 130      | 0.091 | 0.341   | 1.151 | 0.867 | 1.526  |
| UC      | NL             | FCGR3B_<2 | 38    | 0.066 | 83       | 0.058 | 0.448   | 1.182 | 0.795 | 1.756  |
|         |                | FCGR3B_2  | 476   | 0.828 | 1213     | 0.851 |         |       |       |        |
|         |                | FCGR3B_>2 | 61    | 0.106 | 130      | 0.091 | 0.276   | 1.205 | 0.874 | 1.661  |
| RA_all  | NL             | FCGR3B_<2 | 44    | 0.068 | 83       | 0.058 | 0.361   | 1.204 | 0.826 | 1.757  |
|         |                | FCGR3B_2  | 539   | 0.832 | 1213     | 0.851 |         |       |       |        |
|         |                | FCGR3B_>2 | 65    | 0.100 | 130      | 0.091 | 0.462   | 1.133 | 0.828 | 1.550  |
|         | SW             | FCGR3B_<2 | 33    | 0.049 | 29       | 0.031 | 0.087   | 1.602 | 0.931 | 2.769  |
|         |                | FCGR3B_2  | 568   | 0.841 | 800      | 0.851 |         |       |       |        |
|         |                | FCGR3B_>2 | 74    | 0.110 | 111      | 0.118 | 0.750   | 0.939 | 0.676 | 1.298  |
|         | US             | FCGR3B_<2 | 175   | 0.079 | 109      | 0.086 | 0.519   | 0.921 | 0.712 | 1.196  |
|         |                | FCGR3B_2  | 1793  | 0.804 | 1029     | 0.813 |         |       |       |        |
|         |                | FCGR3B_>2 | 261   | 0.117 | 128      | 0.101 | 0.177   | 1.170 | 0.930 | 1.478  |
|         | S_Bost         | FCGR3B_<2 | 95    | 0.094 | 130      | 0.070 | 0.029   | 1.364 | 1.022 | 1.817  |
|         |                | FCGR3B_2  | 829   | 0.819 | 1548     | 0.836 |         |       |       |        |
|         |                | FCGR3B_>2 | 88    | 0.087 | 174      | 0.094 | 0.733   | 0.944 | 0.712 | 1.245  |
|         | NL             | FCGR3B_<2 | 26    | 0.078 | 83       | 0.058 | 0.166   | 1.414 | 0.896 | 2.231  |
|         |                | FCGR3B_2  | 275   | 0.828 | 1213     | 0.851 |         |       |       |        |
|         |                | FCGR3B_>2 | 31    | 0.093 | 130      | 0.091 | 0.810   | 1.074 | 0.713 | 1.620  |
|         | SW             | FCGR3B_<2 | 22    | 0.054 | 29       | 0.031 | 0.062   | 1.753 | 0.945 | 3.210  |
|         |                | FCGR3B_2  | 346   | 0.852 | 800      | 0.851 |         |       |       |        |



|         |        |           |      |       |      |       |       |       |       |       |
|---------|--------|-----------|------|-------|------|-------|-------|-------|-------|-------|
| A_CCpoc | US     | FCGR3B_>2 | 38   | 0.094 | 111  | 0.118 | 0.254 | 0.792 | 0.521 | 1.181 |
|         |        | FCGR3B_<2 | 128  | 0.082 | 109  | 0.086 | 0.732 | 0.951 | 0.721 | 1.256 |
|         |        | FCGR3B_2  | 1271 | 0.814 | 1029 | 0.813 |       |       |       |       |
|         | S_Bost | FCGR3B_>2 | 162  | 0.104 | 128  | 0.101 | 0.851 | 1.025 | 0.796 | 1.322 |
|         |        | FCGR3B_<2 | 95   | 0.095 | 130  | 0.070 | 0.024 | 1.383 | 1.035 | 1.841 |
|         |        | FCGR3B_2  | 818  | 0.817 | 1548 | 0.836 |       |       |       |       |
| A_CCpne | NL     | FCGR3B_>2 | 88   | 0.088 | 174  | 0.094 | 0.784 | 0.957 | 0.722 | 1.262 |
|         |        | FCGR3B_<2 | 17   | 0.057 | 83   | 0.058 | 0.970 | 1.032 | 0.606 | 1.759 |
|         |        | FCGR3B_2  | 251  | 0.837 | 1213 | 0.851 |       |       |       |       |
|         | SW     | FCGR3B_>2 | 32   | 0.107 | 130  | 0.091 | 0.406 | 1.214 | 0.807 | 1.824 |
|         |        | FCGR3B_<2 | 9    | 0.047 | 29   | 0.031 | 0.259 | 1.622 | 0.662 | 3.607 |
|         |        | FCGR3B_2  | 153  | 0.805 | 800  | 0.851 |       |       |       |       |
|         | US     | FCGR3B_>2 | 28   | 0.147 | 111  | 0.118 | 0.224 | 1.319 | 0.809 | 2.094 |
|         |        | FCGR3B_<2 | 39   | 0.074 | 109  | 0.086 | 0.633 | 0.902 | 0.598 | 1.338 |
|         |        | FCGR3B_2  | 408  | 0.773 | 1029 | 0.813 |       |       |       |       |
|         |        | FCGR3B_>2 | 81   | 0.153 | 128  | 0.101 | 0.003 | 1.596 | 1.165 | 2.177 |

Supplemental table 9. Results of association analysis of *FCGR3A*&*FCGR3B* CNV.

| disease | population | status     | cases      | freq cases | controls | freq contr | p-value | OR    | Cilow | Cihigh |       |
|---------|------------|------------|------------|------------|----------|------------|---------|-------|-------|--------|-------|
| CeD     | NL         | FCGR3AB_<2 | 84         | 0.076      | 95       | 0.067      | 0.234   | 1.206 | 0.888 | 1.637  |       |
|         |            | FCGR3AB_2  | 842        | 0.759      | 1147     | 0.805      |         |       |       |        |       |
|         |            | FCGR3AB_>2 | 183        | 0.165      | 183      | 0.128      | 0.007   | 1.362 | 1.089 | 1.702  |       |
|         | IN         | FCGR3AB_<2 | 26         | 0.116      | 38       | 0.098      | 0.404   | 1.274 | 0.715 | 2.242  |       |
|         |            | FCGR3AB_2  | 161        | 0.719      | 300      | 0.771      |         |       |       |        |       |
|         |            | FCGR3AB_>2 | 37         | 0.165      | 51       | 0.131      | 0.226   | 1.351 | 0.823 | 2.203  |       |
|         | IT         | FCGR3AB_<2 | 125        | 0.091      | 149      | 0.119      | 0.024   | 0.742 | 0.571 | 0.963  |       |
|         |            | FCGR3AB_2  | 1101       | 0.803      | 974      | 0.776      |         |       |       |        |       |
|         |            | FCGR3AB_>2 | 145        | 0.106      | 132      | 0.105      | 0.848   | 0.972 | 0.750 | 1.260  |       |
|         | PL         | FCGR3AB_<2 | 47         | 0.093      | 31       | 0.058      | 0.043   | 1.667 | 1.013 | 2.776  |       |
|         |            | FCGR3AB_2  | 379        | 0.752      | 417      | 0.784      |         |       |       |        |       |
|         |            | FCGR3AB_>2 | 78         | 0.155      | 84       | 0.158      | 0.931   | 1.022 | 0.718 | 1.453  |       |
|         | SP         | FCGR3AB_<2 | 69         | 0.128      | 29       | 0.095      | 0.305   | 1.308 | 0.809 | 2.159  |       |
|         |            | FCGR3AB_2  | 411        | 0.761      | 226      | 0.739      |         |       |       |        |       |
|         |            | FCGR3AB_>2 | 60         | 0.111      | 51       | 0.167      | 0.043   | 0.647 | 0.422 | 0.995  |       |
|         | IBD        | NL         | FCGR3AB_<2 | 117        | 0.079    | 95         | 0.067   | 0.166 | 1.219 | 0.919  | 1.616 |
|         |            |            | FCGR3AB_2  | 1157       | 0.785    | 1147       | 0.805   |       |       |        |       |
|         |            |            | FCGR3AB_>2 | 199        | 0.135    | 183        | 0.128   | 0.497 | 1.078 | 0.868  | 1.338 |
| CrD     | NL         | FCGR3AB_<2 | 72         | 0.080      | 95       | 0.067      | 0.202   | 1.235 | 0.897 | 1.699  |       |
|         |            | FCGR3AB_2  | 706        | 0.786      | 1147     | 0.805      |         |       |       |        |       |
|         |            | FCGR3AB_>2 | 120        | 0.134      | 183      | 0.128      | 0.618   | 1.068 | 0.833 | 1.369  |       |
| UC      | NL         | FCGR3AB_<2 | 45         | 0.078      | 95       | 0.067      | 0.325   | 1.217 | 0.841 | 1.761  |       |
|         |            | FCGR3AB_2  | 451        | 0.784      | 1147     | 0.805      |         |       |       |        |       |
|         |            | FCGR3AB_>2 | 79         | 0.137      | 183      | 0.128      | 0.521   | 1.104 | 0.831 | 1.468  |       |
| RA_all  | NL         | FCGR3AB_<2 | 47         | 0.073      | 95       | 0.067      | 0.573   | 1.121 | 0.780 | 1.612  |       |
|         |            | FCGR3AB_2  | 511        | 0.789      | 1147     | 0.805      |         |       |       |        |       |
|         |            | FCGR3AB_>2 | 90         | 0.139      | 183      | 0.128      | 0.478   | 1.109 | 0.844 | 1.456  |       |
|         | SW         | FCGR3AB_<2 | 42         | 0.062      | 47       | 0.050      | 0.317   | 1.271 | 0.805 | 2.000  |       |
|         |            | FCGR3AB_2  | 526        | 0.779      | 748      | 0.796      |         |       |       |        |       |
|         |            | FCGR3AB_>2 | 107        | 0.159      | 145      | 0.154      | 0.727   | 1.049 | 0.790 | 1.391  |       |
|         | US         | FCGR3AB_<2 | 192        | 0.086      | 121      | 0.096      | 0.420   | 0.901 | 0.704 | 1.156  |       |
|         |            | FCGR3AB_2  | 1686       | 0.756      | 957      | 0.756      |         |       |       |        |       |
|         |            | FCGR3AB_>2 | 351        | 0.157      | 188      | 0.148      | 0.588   | 1.060 | 0.869 | 1.294  |       |
|         | S_Bost     | FCGR3AB_<2 | 109        | 0.108      | 147      | 0.079      | 0.019   | 1.370 | 1.043 | 1.795  |       |
|         |            | FCGR3AB_2  | 789        | 0.780      | 1458     | 0.787      |         |       |       |        |       |
|         |            | FCGR3AB_>2 | 114        | 0.113      | 247      | 0.133      | 0.211   | 0.853 | 0.666 | 1.088  |       |
|         | NL         | FCGR3AB_<2 | 27         | 0.081      | 95       | 0.067      | 0.364   | 1.259 | 0.807 | 1.964  |       |
|         |            | FCGR3AB_2  | 265        | 0.798      | 1147     | 0.805      |         |       |       |        |       |
|         |            | FCGR3AB_>2 | 40         | 0.120      | 183      | 0.128      | 0.767   | 0.962 | 0.667 | 1.386  |       |
|         | SW         | FCGR3AB_<2 | 29         | 0.071      | 47       | 0.050      | 0.155   | 1.446 | 0.861 | 2.395  |       |
|         |            | FCGR3AB_2  | 319        | 0.786      | 748      | 0.796      |         |       |       |        |       |

|            |        |            |       |       |       |       |       |       |       |       |
|------------|--------|------------|-------|-------|-------|-------|-------|-------|-------|-------|
| _CCPr      |        | FCGR3AB_>2 | 58    | 0.143 | 145   | 0.154 | 0.738 | 0.938 | 0.661 | 1.319 |
|            | US     | FCGR3AB_<2 | 139   | 0.089 | 121   | 0.096 | 0.552 | 0.920 | 0.705 | 1.202 |
|            |        | FCGR3AB_2  | 1195  | 0.766 | 957   | 0.756 |       |       |       |       |
|            |        | FCGR3AB_>2 | 227   | 0.145 | 188   | 0.148 | 0.787 | 0.967 | 0.779 | 1.202 |
|            | S_Bost | FCGR3AB_<2 | 109   | 0.109 | 147   | 0.079 | 0.016 | 1.389 | 1.058 | 1.821 |
|            |        | FCGR3AB_2  | 778   | 0.777 | 1458  | 0.787 |       |       |       |       |
| FCGR3AB_>2 |        | 114        | 0.114 | 247   | 0.133 | 0.256 | 0.865 | 0.675 | 1.104 |       |
| _CCPr      | NL     | FCGR3AB_<2 | 19    | 0.063 | 95    | 0.067 | 0.939 | 1.018 | 0.613 | 1.690 |
|            |        | FCGR3AB_2  | 234   | 0.780 | 1147  | 0.805 |       |       |       |       |
|            |        | FCGR3AB_>2 | 47    | 0.157 | 183   | 0.128 | 0.197 | 1.274 | 0.899 | 1.806 |
|            | SW     | FCGR3AB_<2 | 11    | 0.058 | 47    | 0.050 | 0.580 | 1.233 | 0.562 | 2.485 |
|            |        | FCGR3AB_2  | 142   | 0.747 | 748   | 0.796 |       |       |       |       |
|            |        | FCGR3AB_>2 | 37    | 0.195 | 145   | 0.154 | 0.157 | 1.344 | 0.872 | 2.036 |
|            | US     | FCGR3AB_<2 | 47    | 0.089 | 121   | 0.096 | 1.000 | 0.978 | 0.669 | 1.413 |
|            |        | FCGR3AB_2  | 380   | 0.720 | 957   | 0.756 |       |       |       |       |
|            |        | FCGR3AB_>2 | 101   | 0.191 | 188   | 0.148 | 0.033 | 1.353 | 1.022 | 1.784 |

Supplemental table 10

Results of meta-analysis of *FCGR3A*, *FCGR3B* and combined *FCGR3A* and *FCGR3B* CNV state in RA (CCP+ and CCP-), CeD and IBD

Low and high CNVs are compared with average (average is 2 for *FCGR3A* and *FCGR3B*, and 4 for *FCGR3A+FCGR3B* analysis).

| disease        | status                  | p-value | OR    | Cilow | Cihigh |
|----------------|-------------------------|---------|-------|-------|--------|
| META_CeD       | FCGR3A_low_vs_average   | 0.536   | 1.147 | 0.743 | 1.771  |
| META_RA_CCPpos | FCGR3A_low_vs_average   | 0.737   | 0.932 | 0.619 | 1.403  |
| META_RA_CCPneg | FCGR3A_low_vs_average   | 0.369   | 0.770 | 0.436 | 1.361  |
| META_RA_All    | FCGR3A_low_vs_average   | 0.353   | 0.859 | 0.623 | 1.184  |
| META_CeD       | FCGR3A_high_vs_average  | 0.661   | 0.951 | 0.759 | 1.191  |
| META_RA_CCPpos | FCGR3A_high_vs_average  | 0.087   | 0.837 | 0.683 | 1.026  |
| META_RA_CCPneg | FCGR3A_high_vs_average  | 0.557   | 0.901 | 0.637 | 1.275  |
| META_RA_All    | FCGR3A_high_vs_average  | 0.099   | 0.847 | 0.695 | 1.032  |
| META_CeD       | FCGR3B_low_vs_average   | 0.737   | 1.030 | 0.867 | 1.223  |
| META_RA_CCPpos | FCGR3B_low_vs_average   | 0.023   | 1.229 | 1.029 | 1.467  |
| META_RA_CCPneg | FCGR3B_low_vs_average   | 0.933   | 1.016 | 0.701 | 1.472  |
| META_RA_All    | FCGR3B_low_vs_average   | 0.084   | 1.152 | 0.981 | 1.354  |
| META_CeD       | FCGR3B_high_vs_average  | 0.085   | 1.149 | 0.981 | 1.345  |
| META_RA_CCPpos | FCGR3B_high_vs_average  | 0.661   | 0.963 | 0.812 | 1.141  |
| META_RA_CCPneg | FCGR3B_high_vs_average  | 0.002   | 1.429 | 1.146 | 1.782  |
| META_RA_All    | FCGR3B_high_vs_average  | 0.344   | 1.075 | 0.925 | 1.250  |
| META_CeD       | FCGR3AB_low_vs_average  | 0.651   | 1.039 | 0.880 | 1.227  |
| META_RA_CCPpos | FCGR3AB_low_vs_average  | 0.052   | 1.182 | 0.998 | 1.399  |
| META_RA_CCPneg | FCGR3AB_low_vs_average  | 0.878   | 1.021 | 0.785 | 1.328  |
| META_RA_All    | FCGR3AB_low_vs_average  | 0.149   | 1.122 | 0.960 | 1.312  |
| META_CeD       | FCGR3AB_high_vs_average | 0.166   | 1.110 | 0.958 | 1.286  |
| META_RA_CCPpos | FCGR3AB_high_vs_average | 0.300   | 0.931 | 0.814 | 1.066  |
| META_RA_CCPneg | FCGR3AB_high_vs_average | 0.004   | 1.328 | 1.093 | 1.614  |
| META_RA_All    | FCGR3AB_high_vs_average | 0.870   | 1.010 | 0.892 | 1.144  |

Supplemental table 11.

Breslow-Day analysis for heterogeneity of CNV association in all tested populations

| genotype                | p-value_Breslow_Day_test |
|-------------------------|--------------------------|
| FCGR3A_low_vs_average   | 0.23                     |
| FCGR3A_high_vs_average  | 0.37                     |
| FCGR3B_low_vs_average   | 0.01                     |
| FCGR3B_high_vs_average  | 0.17                     |
| FCGR3AB_low_vs_average  | 0.02                     |
| FCGR3AB_high_vs_average | 0.08                     |

Supplemental table 12.

Power calculation for FCGR3A, FCGR3B and combined FCGR3A&FCGR3B CNV in all studied groups

| Disease   | OR  | pw_FCGR3A<br>_low | pw_FCGR3A<br>_high | pw_FCGR3B<br>_low | pw_FCGR3B<br>_high | pw_FCGR3<br>AB_low | pw_FCGR3<br>AB_high |
|-----------|-----|-------------------|--------------------|-------------------|--------------------|--------------------|---------------------|
| CeD       | 1.2 | 0.230             | 0.6021             | 0.665             | 0.807              | 0.769              | 0.896               |
| CeD       | 1.5 | 0.859             | 0.9997             | 1.000             | 1                  | 1                  | 1                   |
| CeD       | 2.0 | 1.000             | 1                  | 1                 | 1                  | 1                  | 1                   |
| IBD       | 1.2 | 0.113             | 0.2605             | 0.294             | 0.389              | 0.360              | 0.481               |
| IBD       | 1.5 | 0.435             | 0.9005             | 0.936             | 0.983              | 0.974              | 0.996               |
| IBD       | 2.0 | 0.926             | 1                  | 1                 | 1                  | 1                  | 1                   |
| RA_CCPpos | 1.2 | 0.249             | 0.6446             | 0.7074            | 0.842              | 0.807              | 0.920               |
| RA_CCPpos | 1.5 | 0.898             | 0.9999             | 1                 | 1                  | 1                  | 1                   |
| RA_CCPpos | 2.0 | 1                 | 1                  | 1                 | 1                  | 1                  | 1                   |
| RA_CCPneg | 1.2 | 0.131             | 0.317              | 0.357             | 0.467              | 0.434              | 0.567               |
| RA_CCPneg | 1.5 | 0.565             | 0.965              | 0.981             | 0.9989             | 0.995              | 0.9994              |
| RA_CCPneg | 2.0 | 0.989             | 1                  | 1                 | 1                  | 1                  | 1                   |
| RA_all    | 1.2 | 0.291             | 0.727              | 0.788             | 0.904              | 0.876              | 0.960               |
| RA_all    | 1.5 | 0.9405            | 1                  | 1                 | 1                  | 1                  | 1                   |
| RA_all    | 2.0 | 1                 | 1                  | 1                 | 1                  | 1                  | 1                   |
