# Supplementary material
Source: PubMed Central journal article supplement (PMC4717214)

Supplementary Figure 4.

A

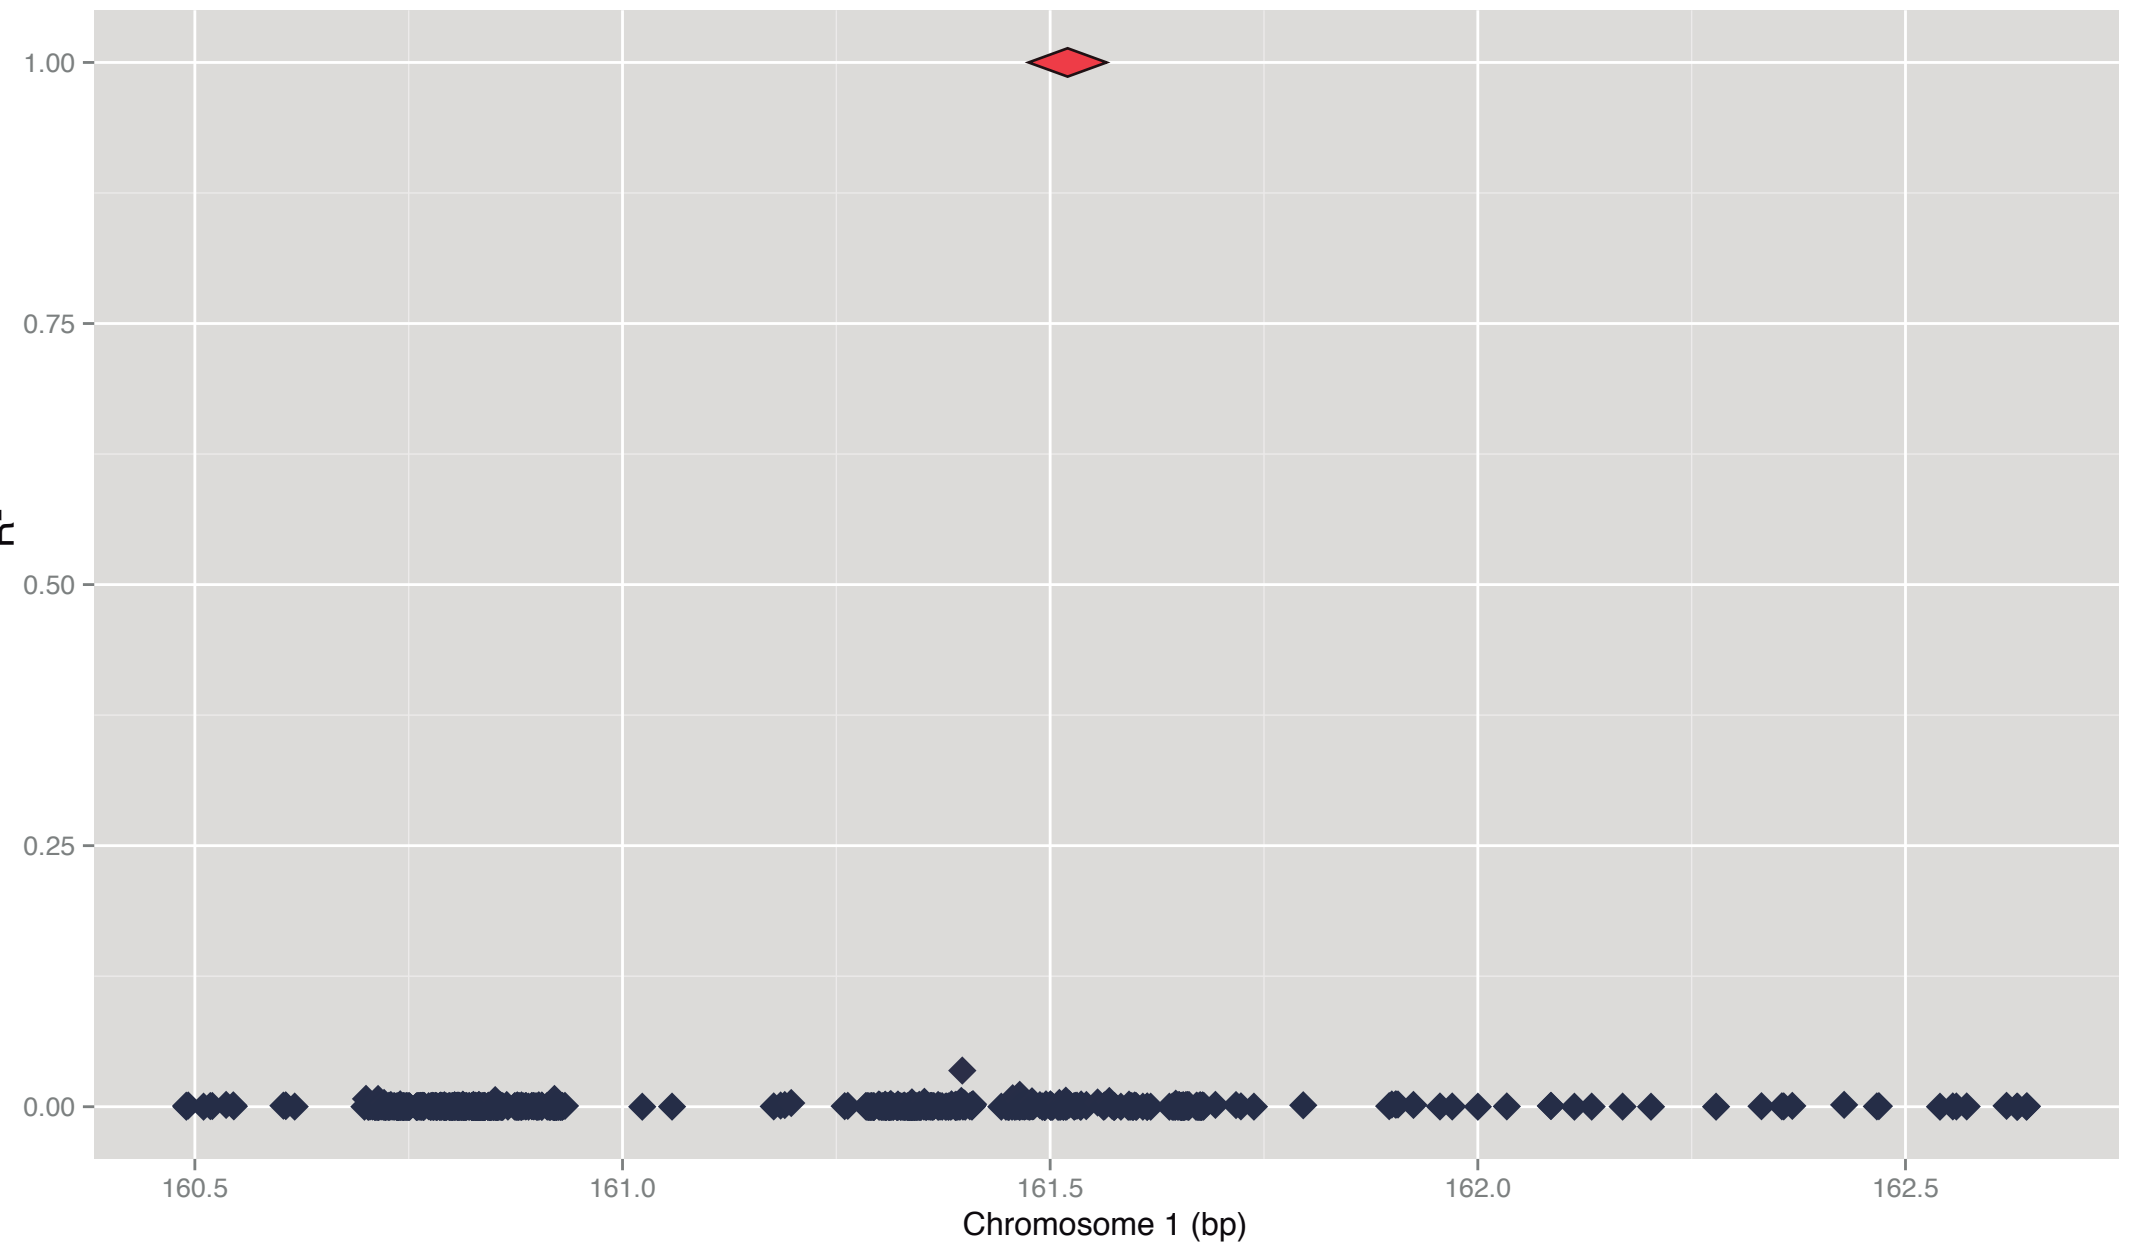

B

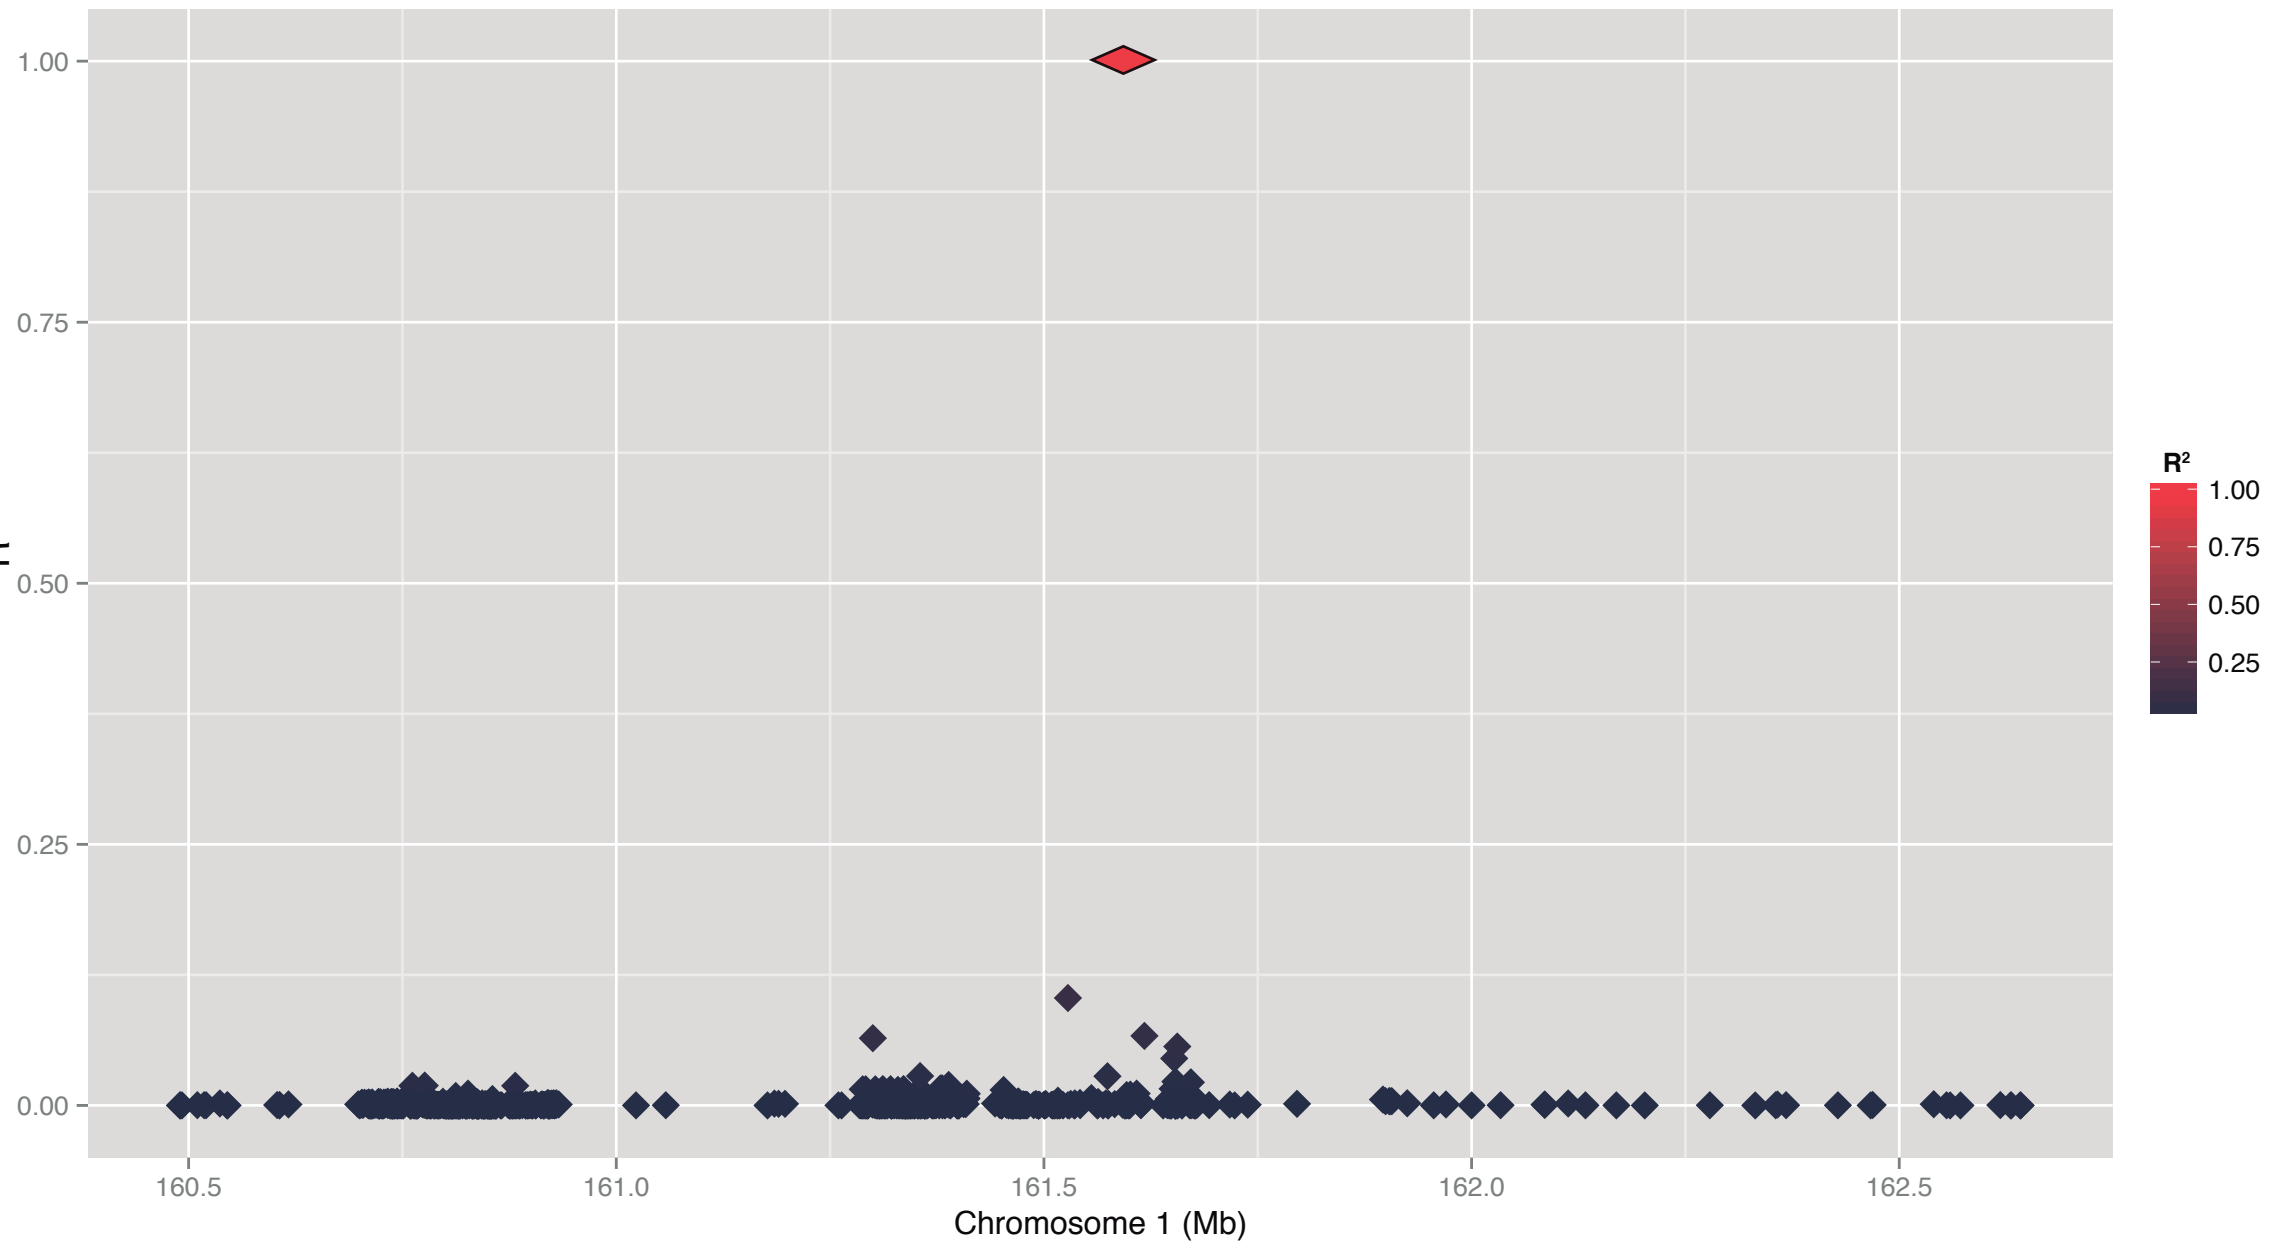

Supplement: ejhg201595x8.pdf [file ejhg201595x8.pdf]
